# Supplementary material for: Characterization and Genomic Analysis of a New Bacteriophage Klebsiella pneumoniae CTF-1 from Turkey
Source: Research Square preprint supplement (doi:10.21203/rs.3.rs-6506509/v1), 2025-05-14
Supplement: Supplementary file 1 [file 13dec339b1e582081381f523.xlsx]

## Sheet: Sayfa1
Rho #	location	Motifs	strand	Sequence	Score
rho 1	2423	Rnamotif	+	GTGAGCAATACCCGGAGTTAGACATCCGGTTAGTGTTCTCT	-8.1
rho 2	4967	Both	+	GTAATCAGCAAGGGGACATGCCTAATCTTGTCCTCcTTCGTATTCTCA	-9.3
rho 3	14974	Both	+	TAATAAGCCAAACCCCTTGGGGACCACTCACGGTCTCTGAGGGGTTTTTTCGTTAGGA	-8.8
rho 4	25337	Rnamotif	+	GTAGCACTATAGGGAGACCGCTTGGTTTCCCTTCTAATTCAAC	-13.3
rho 5	30854	Rnamotif	+	CGCAACTGAAGGGTGACTTTGTCGCCTTTCTCTTCGTG	-7.4
rho 6	34663	Rnamotif	+	ACGCCCTGATTGTCCTGTACTTTGTGCGGGACTTTTGTAAGGGT	-10.5
