# Supplementary material for: Characterization and Genomic Analysis of a New Bacteriophage Klebsiella pneumoniae CTF-1 from Turkey
Source: Research Square preprint supplement (doi:10.21203/rs.3.rs-6506509/v1), 2025-05-14
Supplement: Supplementary file 2 [file 2952dc5c1c10a2b8b0473b68.xlsx]

## Sheet: Sayfa1
Prokka_name	name	acession	function	taxonomy	% identity	alignment length	mismatches	gap opens	q. start	q. end	evalue	bit score
PROKKA_00001	Gp1	UZT48329.1	DNA ligase	[Klebsiella phage vB_KpnP_K2044-302]	95.862	145	6	0	1	145	5.23e-98	293
PROKKA_00002	Gp2	YP_003347528.1	BC10 family protein	[Klebsiella phage KP32]	100	87	0	0	1	87	3.29e-57	178
PROKKA_00003	Gp3	YP_009966341.1	nucleotide kinase	[Klebsiella phage SH-Kp 152234]	85.075	134	11	1	1	125	1.38e-75	228
PROKKA_00004	Gp4	YP_009190966.1	hypothetical protein AU151_gp19	[Klebsiella phage vB_Kp1]	100	41	0	0	1	41	7.41e-23	88.2
PROKKA_00005	Gp5	YP_009801318.1	bacterial RNA polymerase inhibitor	[Klebsiella phage KP32_isolate 192]	100	49	0	0	1	49	2.33e-27	100
PROKKA_00006	Gp6	YP_009791668.1	single-stranded DNA-binding protein	[Klebsiella phage 2044-307w]	99.567	231	1	0	1	231	2.04e-167	468
PROKKA_00007	Gp7	YP_004678737.1	endonuclease I	[Escherichia phage K30]	100	149	0	0	1	149	1.38e-105	305
PROKKA_00008	Gp8	YP_009818012.1	N-acetylmuramoyl-L-alanine amidase	[Klebsiella phage KN3-1]	100	151	0	0	1	151	5.68e-111	320
PROKKA_00009	Gp9	YP_009791671.1	toprim domain-containing protein	[Klebsiella phage 2044-307w]	99.803	508	1	0	1	508	0	1046
PROKKA_00010	Gp10	YP_009818413.1	hypothetical protein HOU94_gp19	[Klebsiella phage Henu1]	98.551	69	1	0	1	69	5.14e-36	124
PROKKA_00011	Gp11	QAU05525.1	hypothetical protein D3A56_0020	[Klebsiella phage Kund-ULIP47]	100	90	0	0	1	90	5.48e-58	180
PROKKA_00012	Gp12	YP_009786867.1	hypothetical protein HOR24_gp23	[Klebsiella phage vB_KpnP_KpV766]	98.425	127	2	0	1	127	1.13e-87	258
PROKKA_00013	Gp13	YP_009821359.1	DNA polymerase	[Klebsiella phage Pharr]	98.729	708	9	0	1	708	0	1455
PROKKA_00014	Gp14	QFR57248.1	hypothetical protein AmPhEK52_0024	[Klebsiella phage AmPh_EK52]	99	100	1	0	1	100	5.98e-66	201
PROKKA_00015	Gp15	YP_009190979.1	HNS binding protein	[Klebsiella phage vB_Kp1]	100	69	0	0	1	69	1.21e-43	142
PROKKA_00016	Gp16	YP_009787480.1	hypothetical protein HOR32_gp34	[Klebsiella phage vB_KpnP_BIS33]	94.828	58	3	0	1	58	7.53e-34	117
PROKKA_00017	Gp17	YP_009817994.1	exonuclease	[Klebsiella phage KN4-1]	99.336	301	2	0	1	301	0	622
PROKKA_00018	Gp18	YP_009786824.1	hypothetical protein HOR23_gp32	[Klebsiella phage vB_KpnP_KpV767]	100	36	0	0	1	36	2.71e-15	68.9
PROKKA_00019	Gp19	YP_002003818.1	DUF2717 domain-containing protein	[Klebsiella phage K11]	98.765	81	1	0	1	81	4.15e-53	167
PROKKA_00020	Gp20	YP_009786826.1	DUF5476 domain-containing protein	[Klebsiella phage vB_KpnP_KpV767]	100	73	0	0	1	73	3.16e-44	144
PROKKA_00021	Gp21	QEQ50456.1	putative tail assembly protein	[Klebsiella phage vB_KpnP_IME335]	98.837	86	1	0	1	86	3.41e-51	162
PROKKA_00022	Gp22	QCG76448.1	portal protein	[Klebsiella phage vB_KpnP_FZ12]	100	535	0	0	1	535	0	1087
PROKKA_00023	Gp23	YP_009801463.1	capsid assembly protein	[Klebsiella phage KP32_isolate 196]	98.125	320	6	0	1	320	0	638
PROKKA_00024	Gp24	YP_009817997.1	capsid and scaffold protein	[Klebsiella phage KN4-1]	100	343	0	0	1	343	0	696
PROKKA_00025	Gp25	YP_009966366.1	minor capsid protein	[Klebsiella phage SH-Kp 152234]	100	73	0	0	1	73	1.71e-44	145
PROKKA_00026	Gp26	YP_009198661.1	tail protein	[Klebsiella phage K5]	99.479	192	1	0	1	192	5.89e-141	398
PROKKA_00027	Gp27	YP_009801379.1	tail tubular protein B	[Klebsiella phage KP32_isolate 194]	99.115	791	7	0	1	791	0	1627
PROKKA_00028	Gp28	QBG78381.1	internal (core) protein	[Klebsiella phage Kund-ULIP54]	99.265	136	1	0	1	136	6.99e-99	287
PROKKA_00029	Gp29	YP_009818001.1	internal virion protein B	[Klebsiella phage KN4-1]	99.49	196	1	0	1	196	1.24e-139	395
PROKKA_00030	Gp30	QOV05499.1	DNA ejectosome component	[Klebsiella phage P560]	99.467	751	4	0	1	751	0	1536
PROKKA_00031	Gp31	QAU05544.1	peptidoglycan transglycosylase	[Klebsiella phage Kund-ULIP47]	98.789	1321	16	0	1	1321	0	2685
PROKKA_00032	Gp32	YP_003347555.1	tail fiber protein	[Klebsiella phage KP32]	95.373	670	31	0	1	670	0	1303
PROKKA_00033	Gp33	YP_003347555.1	tail fiber protein	[Klebsiella phage KP32]	95.455	176	8	0	1	176	2.29e-113	349
PROKKA_00034	Gp34	DAH90869.1	MAG TPA: tailspike protein	[Myoviridae sp.]	48.07	570	287	7	34	595	2.02e-180	535
PROKKA_00035	Gp35	UVX29717.1	holin	[Klebsiella phage VLCpiA3a]	100	67	0	0	1	67	6.57e-40	133
PROKKA_00036	Gp36	YP_009786789.1	putative DNA packaging protein A	[Klebsiella phage vB_KpnP_KpV763]	100	85	0	0	1	85	4.31e-55	172
PROKKA_00037	Gp37	YP_009786842.1	lysis system i-spanin subunit Rz	[Klebsiella phage vB_KpnP_KpV767]	97.973	148	3	0	1	148	4.9e-102	296
PROKKA_00038	Gp38	QOV06399.1	hypothetical protein DNHFEEIH_00085	[Klebsiella phage 066013]	99.829	585	1	0	1	585	0	1217
PROKKA_00039	Gp39	YP_004678769.1	gp19.5 family protein	[Escherichia phage K30]	100	49	0	0	1	49	1.59e-24	92.8
PROKKA_00040	Gp40	UMO77070.1	S-adenosyl-L-methionine hydrolase	[Klebsiella phage IME264]	97.419	155	4	0	1	155	1.65e-109	315
PROKKA_00041	Gp41	QAU05507.1	hypothetical protein D3A56_0002	[Klebsiella phage Kund-ULIP47]	93.333	60	4	0	1	60	4.14e-36	122
PROKKA_00042	Gp42	QXO10457.1	hypothetical protein	[Klebsiella phage vB_KoxP_ZX8]	96.923	65	2	0	1	65	3.99e-38	128
PROKKA_00043	Gp43	QEG09951.1	hypothetical protein KMI2_21	[Klebsiella phage KMI2]	94.643	56	3	0	1	56	2.39e-28	103
PROKKA_00044	Gp44	UUU45380.1	kinase	[Klebsiella phage NK20]	91.576	368	31	0	1	368	0	643
PROKKA_00045	Gp45	UUU45379.1	DNA dependent RNA polymerase	[Klebsiella phage NK20]	99.558	906	4	0	1	906	0	1878
PROKKA_00046	Gp46	YP_009817989.1	hypothetical protein HOU86_gp04	[Klebsiella phage KN4-1]	97.326	187	5	0	1	187	2.12e-131	374
PROKKA_00047	Gp47	YP_009966337.1	hypothetical protein HOT34_gp08	[Klebsiella phage SH-Kp 152234]	94.737	76	4	0	1	76	1.28e-45	148
